# Supplementary material for: Mapping the STK4/Hippo signaling network in prostate cancer cell
Source: PLoS One. 2017 Sep 7;12(9):e0184590. doi: 10.1371/journal.pone.0184590 (PMC5589252; doi:10.1371/journal.pone.0184590)
Supplement: S6 Table — (XLSX) [file pone.0184590.s008.xlsx]

## Sheet: S6 Table
term_id	proteins	hits	pvalue	pvalue_fdr	term_description
1100	1161	187	3.04e-49	8.27e-47	Metabolic pathways
5200	320	75	2.35e-30	3.19e-28	Pathways in cancer
4360	123	47	1.08e-29	7.97e-28	Axon guidance
4151	336	76	1.17e-29	7.97e-28	PI3K-Akt signaling pathway
4510	202	58	1.11e-28	6.04e-27	Focal adhesion
4080	269	64	1.94e-26	8.8e-25	Neuroactive ligand-receptor interaction
5205	218	55	3.27e-24	1.27e-22	Proteoglycans in cancer
4014	219	55	4.16e-24	1.42e-22	Ras signaling pathway
4726	109	37	1.49e-21	4.52e-20	Serotonergic synapse
5202	164	43	6.72e-20	1.83e-18	Transcriptional misregulation in cancer
4514	136	39	1.13e-19	2.79e-18	Cell adhesion molecules (CAMs)
4010	251	52	7.66e-19	1.74e-17	MAPK signaling pathway
4390	146	39	1.76e-18	3.69e-17	Hippo signaling pathway
4015	204	46	2.4e-18	4.67e-17	Rap1 signaling pathway
4020	174	40	1.96e-16	3.55e-15	Calcium signaling pathway
5206	143	35	1.92e-15	3.27e-14	MicroRNAs in cancer
4060	260	48	2.08e-15	3.32e-14	Cytokine-cytokine receptor interaction
4610	68	24	6.76e-15	1.02e-13	Complement and coagulation cascades
5166	250	46	9.14e-15	1.31e-13	HTLV-I infection
4921	152	35	1.42e-14	1.93e-13	Oxytocin signaling pathway
4512	85	26	2.59e-14	3.35e-13	ECM-receptor interaction
4310	135	32	8.11e-14	1e-12	Wnt signaling pathway
4810	208	40	1.14e-13	1.35e-12	Regulation of actin cytoskeleton
4724	109	28	3.42e-13	3.88e-12	Glutamatergic synapse
4750	94	26	3.64e-13	3.96e-12	Inflammatory mediator regulation of TRP channels
4611	126	30	4.28e-13	4.48e-12	Platelet activation
4144	192	37	8.96e-13	9.03e-12	Endocytosis
4727	83	24	1.01e-12	9.82e-12	GABAergic synapse
4022	157	33	1.24e-12	1.17e-11	cGMP-PKG signaling pathway
5412	73	22	3.53e-12	3.2e-11	Arrhythmogenic right ventricular cardiomyopathy (ARVC)
4723	96	25	4.52e-12	3.88e-11	Retrograde endocannabinoid signaling
4911	81	23	4.56e-12	3.88e-11	Insulin secretion
4974	84	23	1.05e-11	8.64e-11	Protein digestion and absorption
5032	87	23	2.31e-11	1.85e-10	Morphine addiction
5146	104	25	3.06e-11	2.37e-10	Amoebiasis
4540	83	22	5.94e-11	4.49e-10	Gap junction
5215	85	22	9.87e-11	7.26e-10	Prostate cancer
4670	113	25	2.08e-10	1.49e-09	Leukocyte transendothelial migration
4012	83	21	4.16e-10	2.9e-09	ErbB signaling pathway
3320	68	19	4.48e-10	2.97e-09	PPAR signaling pathway
4976	68	19	4.48e-10	2.97e-09	Bile secretion
4960	36	14	6.66e-10	4.32e-09	Aldosterone-regulated sodium reabsorption
4520	70	19	7.72e-10	4.88e-09	Adherens junction
4261	141	27	1.24e-09	7.68e-09	Adrenergic signaling in cardiomyocytes
4380	123	25	1.39e-09	8.39e-09	Osteoclast differentiation
4725	107	23	2e-09	1.18e-08	Cholinergic synapse
4713	90	21	2.07e-09	1.2e-08	Circadian entrainment
5140	69	18	4.33e-09	2.4e-08	Leishmaniasis
5218	69	18	4.33e-09	2.4e-08	Melanoma
5217	55	16	5.58e-09	2.98e-08	Basal cell carcinoma
1212	48	15	5.59e-09	2.98e-08	Fatty acid metabolism
4916	96	21	7.18e-09	3.75e-08	Melanogenesis
4978	49	15	7.69e-09	3.95e-08	Mineral absorption
4728	124	24	8.21e-09	4.13e-08	Dopaminergic synapse
4270	115	23	8.7e-09	4.3e-08	Vascular smooth muscle contraction
4340	50	15	1.05e-08	5.09e-08	Hedgehog signaling pathway
5031	65	17	1.11e-08	5.32e-08	Amphetamine addiction
4530	127	24	1.34e-08	6.28e-08	Tight junction
4970	82	19	1.36e-08	6.28e-08	Salivary secretion
5034	137	25	1.41e-08	6.39e-08	Alcoholism
4370	59	16	1.71e-08	7.61e-08	VEGF signaling pathway
4068	120	23	2.03e-08	8.91e-08	FoxO signaling pathway
4915	93	20	2.22e-08	9.58e-08	Estrogen signaling pathway
4640	85	19	2.55e-08	1.09e-07	Hematopoietic cell lineage
340	27	11	2.61e-08	1.09e-07	Histidine metabolism
4666	87	19	3.82e-08	1.57e-07	Fc gamma R-mediated phagocytosis
5414	88	19	4.65e-08	1.86e-07	Dilated cardiomyopathy
5204	71	17	4.67e-08	1.86e-07	Chemical carcinogenesis
982	63	16	4.73e-08	1.86e-07	Drug metabolism - cytochrome P450
410	29	11	6.32e-08	2.46e-07	beta-Alanine metabolism
5410	82	18	7.99e-08	3.06e-07	Hypertrophic cardiomyopathy (HCM)
5222	84	18	1.18e-07	4.46e-07	Small cell lung cancer
5145	112	21	1.23e-07	4.59e-07	Toxoplasmosis
4062	178	27	2.08e-07	7.64e-07	Chemokine signaling pathway
4668	106	20	2.2e-07	7.8e-07	TNF signaling pathway
4961	46	13	2.21e-07	7.8e-07	Endocrine and other factor-regulated calcium reabsorption
5144	46	13	2.21e-07	7.8e-07	Malaria
4064	88	18	2.49e-07	8.69e-07	NF-kappa B signaling pathway
565	40	12	3.14e-07	1.08e-06	Ether lipid metabolism
4972	90	18	3.55e-07	1.21e-06	Pancreatic secretion
5211	64	15	3.87e-07	1.3e-06	Renal cell carcinoma
5030	49	13	4.96e-07	1.64e-06	Cocaine addiction
4145	142	23	4.99e-07	1.64e-06	Phagosome
4630	154	24	5.88e-07	1.9e-06	Jak-STAT signaling pathway
4066	103	19	6.33e-07	2.02e-06	HIF-1 signaling pathway
4913	50	13	6.4e-07	2.02e-06	Ovarian steroidogenesis
5150	51	13	8.2e-07	2.56e-06	Staphylococcus aureus infection
4919	115	20	8.63e-07	2.67e-06	Thyroid hormone signaling pathway
4350	77	16	9.19e-07	2.81e-06	TGF-beta signaling pathway
5203	181	26	1.02e-06	3.07e-06	Viral carcinogenesis
4912	87	17	1.06e-06	3.16e-06	GnRH signaling pathway
350	37	11	1.08e-06	3.2e-06	Tyrosine metabolism
4146	78	16	1.1e-06	3.23e-06	Peroxisome
534	24	9	1.15e-06	3.33e-06	Glycosaminoglycan biosynthesis - heparan sulfate / heparin
590	61	14	1.24e-06	3.51e-06	Arachidonic acid metabolism
5214	61	14	1.24e-06	3.51e-06	Glioma
5161	139	22	1.31e-06	3.64e-06	Hepatitis B
4918	70	15	1.33e-06	3.64e-06	Thyroid hormone synthesis
4971	70	15	1.33e-06	3.64e-06	Gastric acid secretion
4973	38	11	1.46e-06	3.96e-06	Carbohydrate digestion and absorption
5321	62	14	1.53e-06	4.12e-06	Inflammatory bowel disease (IBD)
4964	19	8	1.63e-06	4.35e-06	Proximal tubule bicarbonate reclamation
5033	39	11	1.94e-06	5.12e-06	Nicotine addiction
5100	73	15	2.33e-06	5.99e-06	Bacterial invasion of epithelial cells
5169	189	26	2.33e-06	5.99e-06	Epstein-Barr virus infection
5164	166	24	2.33e-06	5.99e-06	Influenza A
5210	57	13	3.2e-06	8.13e-06	Colorectal cancer
4730	58	13	3.94e-06	9.92e-06	Long-term depression
980	67	14	4.08e-06	1.01e-05	Metabolism of xenobiotics by cytochrome P450
4920	67	14	4.08e-06	1.01e-05	Adipocytokine signaling pathway
4660	98	17	5.84e-06	1.43e-05	T cell receptor signaling pathway
5220	69	14	5.88e-06	1.43e-05	Chronic myeloid leukemia
564	91	16	9.13e-06	2.2e-05	Glycerophospholipid metabolism
561	54	12	1.02e-05	2.42e-05	Glycerolipid metabolism
512	31	9	1.3e-05	3.07e-05	Mucin type O-Glycan biosynthesis
4950	25	8	1.79e-05	4.19e-05	Maturity onset diabetes of the young
330	57	12	1.83e-05	4.24e-05	Arginine and proline metabolism
830	58	12	2.2e-05	5.07e-05	Retinol metabolism
4152	119	18	2.24e-05	5.11e-05	AMPK signaling pathway
5213	50	11	2.62e-05	5.94e-05	Endometrial cancer
4662	69	13	2.91e-05	6.49e-05	B cell receptor signaling pathway
4917	69	13	2.91e-05	6.49e-05	Prolactin signaling pathway
1230	70	13	3.41e-05	7.55e-05	Biosynthesis of amino acids
250	35	9	3.8e-05	8.33e-05	Alanine, aspartate and glutamate metabolism
591	28	8	4.5e-05	9.73e-05	Linoleic acid metabolism
1040	21	7	4.51e-05	9.73e-05	Biosynthesis of unsaturated fatty acids
4720	63	12	5.24e-05	0.000112171	Long-term potentiation
5221	55	11	6.69e-05	0.000140088	Acute myeloid leukemia
5416	55	11	6.69e-05	0.000140088	Viral myocarditis
5162	129	18	6.7e-05	0.000140088	Measles
5120	65	12	7.22e-05	0.000149215	Epithelial cell signaling in Helicobacter pylori infection
4260	75	13	7.24e-05	0.000149215	Cardiac muscle contraction
600	47	10	8.23e-05	0.000168344	Sphingolipid metabolism
4664	66	12	8.43e-05	0.000171082	Fc epsilon RI signaling pathway
62	23	7	8.71e-05	0.000175542	Fatty acid elongation
120	17	6	0.000112203	0.000222767	Primary bile acid biosynthesis
360	17	6	0.000112203	0.000222767	Phenylalanine metabolism
2010	40	9	0.000117715	0.000230355	ABC transporters
4977	24	7	0.000117767	0.000230355	Vitamin digestion and absorption
4650	123	17	0.00011911	0.000230355	Natural killer cell mediated cytotoxicity
480	49	10	0.000119412	0.000230355	Glutathione metabolism
5133	69	12	0.000131665	0.000252204	Pertussis
4722	115	16	0.000172844	0.000328766	Neurotrophin signaling pathway
601	26	7	0.000205205	0.000384936	Glycosphingolipid biosynthesis - lacto and neolacto series
650	26	7	0.000205205	0.000384936	Butanoate metabolism
4672	44	9	0.000255454	0.000475914	Intestinal immune network for IgA production
4930	45	9	0.000305445	0.000565178	Type II diabetes mellitus
532	20	6	0.000309212	0.000568282	Glycosaminoglycan biosynthesis - chondroitin sulfate / dermatan sulfate
4115	66	11	0.000365543	0.000667299	p53 signaling pathway
240	100	14	0.000404389	0.000733291	Pyrimidine metabolism
230	163	19	0.000465308	0.000838171	Purine metabolism
4320	22	6	0.000546698	0.00096978	Dorso-ventral axis formation
260	39	8	0.000549067	0.00096978	Glycine, serine and threonine metabolism
4975	39	8	0.000549067	0.00096978	Fat digestion and absorption
533	15	5	0.000583695	0.00102429	Glycosaminoglycan biosynthesis - keratan sulfate
5160	128	16	0.000591455	0.00103126	Hepatitis C
5212	61	10	0.000765698	0.00132656	Pancreatic cancer
5152	170	19	0.000783333	0.00134852	Tuberculosis
4910	132	16	0.000830324	0.00142043	Insulin signaling pathway
4210	84	12	0.000854918	0.00145336	Apoptosis
4142	120	15	0.000866455	0.00146382	Lysosome
592	24	6	0.000905945	0.00152109	alpha-Linolenic acid metabolism
5130	52	9	0.000929942	0.0015518	Pathogenic Escherichia coli infection
5323	85	12	0.000951462	0.00157803	Rheumatoid arthritis
40	33	7	0.000984419	0.00161745	Pentose and glucuronate interconversions
430	10	4	0.000987121	0.00161745	Taurine and hypotaurine metabolism
5168	174	19	0.00103796	0.00169057	Herpes simplex infection
140	53	9	0.00107172	0.00173517	Steroid hormone biosynthesis
71	43	8	0.00108624	0.00174827	Fatty acid degradation
4614	17	5	0.00110722	0.00177156	Renin-angiotensin system
5223	54	9	0.00123049	0.00195727	Non-small cell lung cancer
4070	78	11	0.00154365	0.00244112	Phosphatidylinositol signaling system
4914	79	11	0.00171477	0.00269605	Progesterone-mediated oocyte maturation
5216	27	6	0.00175479	0.00274313	Thyroid cancer
5322	94	12	0.00230128	0.00357685	Systemic lupus erythematosus
4150	59	9	0.00233225	0.00360439	mTOR signaling pathway
300	2	2	0.00244978	0.00376464	Lysine biosynthesis
4721	60	9	0.0026257	0.0040123	Synaptic vesicle cycle
380	39	7	0.00273777	0.00415741	Tryptophan metabolism
5142	96	12	0.00275123	0.00415741	Chagas disease (American trypanosomiasis)
500	50	8	0.00296383	0.00445393	Starch and sucrose metabolism
603	13	4	0.0029829	0.00445796	Glycosphingolipid biosynthesis - globo series
4940	40	7	0.00317916	0.00472532	Type I diabetes mellitus
4742	51	8	0.0033657	0.00497538	Taste transduction
514	31	6	0.00368731	0.00542134	Other types of O-glycan biosynthesis
640	32	6	0.00435135	0.00636326	Propanoate metabolism
1200	102	12	0.00454464	0.00661039	Carbon metabolism
3430	23	5	0.00470335	0.00680484	Mismatch repair
983	43	7	0.00483258	0.00695482	Drug metabolism - other enzymes
5143	33	6	0.00509955	0.00730041	African trypanosomiasis
280	44	7	0.00550641	0.00784159	Valine, leucine and isoleucine degradation
4114	105	12	0.00573926	0.00813062	Oocyte meiosis
5132	81	10	0.00656426	0.00925119	Salmonella infection
72	9	3	0.008122	0.0113875	Synthesis and degradation of ketone bodies
1210	17	4	0.00847752	0.011825	2-Oxocarboxylic acid metabolism
5219	37	6	0.0090529	0.0125632	Bladder cancer
10	60	8	0.00915929	0.0126463	Glycolysis / Gluconeogenesis
760	27	5	0.00958247	0.0131638	Nicotinate and nicotinamide metabolism
562	61	8	0.0100969	0.0138008	Inositol phosphate metabolism
4620	101	11	0.0113182	0.0153928	Toll-like receptor signaling pathway
620	40	6	0.013189	0.0178478	Pyruvate metabolism
860	41	6	0.0148204	0.0199561	Porphyrin and chlorophyll metabolism
52	30	5	0.014973	0.0200623	Galactose metabolism
5134	53	7	0.0151051	0.0201402	Legionellosis
4120	134	13	0.0156499	0.0207648	Ubiquitin mediated proteolysis
4130	32	5	0.0195122	0.0257636	SNARE interactions in vesicular transport
4962	44	6	0.0205432	0.0269939	Vasopressin-regulated water reabsorption
520	46	6	0.0250944	0.0328158	Amino sugar and nucleotide sugar metabolism
510	48	6	0.030272	0.0393971	N-Glycan biosynthesis
270	36	5	0.0310891	0.0400769	Cysteine and methionine metabolism
5020	36	5	0.0310891	0.0400769	Prion diseases
53	25	4	0.0329692	0.0421015	Ascorbate and aldarate metabolism
4744	25	4	0.0329692	0.0421015	Phototransduction
5010	164	14	0.0334398	0.042503	Alzheimer's disease
5014	50	6	0.0361026	0.045674	Amyotrophic lateral sclerosis (ALS)
4966	26	4	0.0374849	0.0472032	Collecting duct acid secretion
